# Supplementary material for: Hearing Assessment after Treatment of Nasopharyngeal Carcinoma with CRT and IMRT Techniques
Source: PubMed Central journal article supplement (PMC4553178; doi:10.1155/2015/769806), 2015-08-16
Supplement: 769806.f1.pdf [file 769806.f1.pdf]

Supplementary TABLE 1: The air conduction hearing threshold at 0.25–8 kHz with and without age-related correction at the 1- to 9-year follow-up after RT. (Mean±SEM)

| <b>Years</b>                | <b>0.25K Hz</b> | <b>0.5K Hz</b> | <b>1K Hz</b> | <b>2K Hz</b> | <b>4K Hz</b> | <b>8K Hz</b> |
|-----------------------------|-----------------|----------------|--------------|--------------|--------------|--------------|
| <b>Initial year</b>         |                 |                |              |              |              |              |
| <b>With age-adjusted</b>    | 23.03±1.15      | 21.81±1.13     | 24.71±1.38   | 25.34±1.53   | 27.97±1.60   | 26.63±1.53   |
| <b>Without age-adjusted</b> | 26.13±1.21      | 25.66±1.19     | 29.23±1.48   | 32.53±1.70   | 42.57±2.00   | 48.02±2.10   |
| <b>First year</b>           |                 |                |              |              |              |              |
| <b>With age-adjusted</b>    | 33.22±2.35      | 32.71±2.60     | 33.81±2.63   | 34.11±2.87   | 41.18±2.84   | 40.84±2.79   |
| <b>Without age-adjusted</b> | 36.46±2.39      | 36.71±2.66     | 38.10±2.75   | 41.58±3.11   | 58.61±3.25   | 62.67±3.44   |
| <b>Second year</b>          |                 |                |              |              |              |              |
| <b>With age-adjusted</b>    | 36.27±2.54      | 33.87±2.53     | 36.54±2.73   | 35.73±2.93   | 40.76±2.87   | 42.17±2.75   |
| <b>Without age-adjusted</b> | 39.46±2.57      | 37.89±2.58     | 41.27±2.82   | 43.31±3.03   | 57.35±3.21   | 65.66±3.38   |
| <b>Third year</b>           |                 |                |              |              |              |              |
| <b>With age-adjusted</b>    | 34.275±3.12     | 31.804±3.08    | 35.657±3.28  | 35.794±3.21  | 42.725±3.71  | 48.176±3.85  |
| <b>Without age-adjusted</b> | 37.75±3.18      | 35.98±3.16     | 41.08±3.39   | 43.92±3.42   | 59.22±4.24   | 71.18±4.49   |
| <b>Fourth year</b>          |                 |                |              |              |              |              |
| <b>With age-adjusted</b>    | 41.83±2.51      | 38.92±2.42     | 42.1±2.67    | 43.25±2.67   | 48.38±3.17   | 51.56±2.81   |
| <b>Without age-adjusted</b> | 45±2.55         | 43.05±2.48     | 47.29±2.78   | 51.72±2.81   | 65.52±3.57   | 76.38±3.13   |

---

|                             |            |            |            |            |            |            |
|-----------------------------|------------|------------|------------|------------|------------|------------|
| <b>Fifth year</b>           |            |            |            |            |            |            |
| <b>With age-adjusted</b>    | 42.79±3.07 | 42.85±3.00 | 45.75±3.19 | 45±3.42    | 49.24±3.49 | 54.76±3.49 |
| <b>Without age-adjusted</b> | 46.12±3.26 | 47.16±3.18 | 50.75±3.34 | 52.99±3.66 | 66.04±3.81 | 79.25±3.43 |
| <b>6th – 7th years</b>      |            |            |            |            |            |            |
| <b>With age-adjusted</b>    | 51.6±3.16  | 49.45±3.29 | 49.97±3.32 | 51.85±3.30 | 60.21±3.58 | 59.09±3.33 |
| <b>Without age-adjusted</b> | 55.47±3.2  | 54.20±3.46 | 56.70±3.48 | 61.33±3.68 | 77.37±3.87 | 83.39±3.44 |
| <b>8th – 9th years</b>      |            |            |            |            |            |            |
| <b>With age-adjusted</b>    | 66.04±4.7  | 61.1±4.80  | 58.82±5.28 | 60.37±5.24 | 63.57±5.94 | 58.74±4.91 |
| <b>Without age-adjusted</b> | 69.40±4.8  | 66.00±5.05 | 64.63±5.43 | 70.10±5.58 | 84.94±6.27 | 89.81±5.62 |

---

\* SEM = standard error of the mean

Supplementary TABLE 2: The air conduction hearing deterioration at 0.25–8 kHz with and without age-related correction at the 1- to 9-year follow-up after RT. (Mean±SEM)

| <b>Years</b>                | <b>0.25K Hz</b> | <b>0.5K Hz</b> | <b>1K Hz</b> | <b>2K Hz</b> | <b>4K Hz</b> | <b>8K Hz</b> |
|-----------------------------|-----------------|----------------|--------------|--------------|--------------|--------------|
| <b>First year</b>           |                 |                |              |              |              |              |
| <b>With age-adjusted</b>    | 8.17±1.61       | 10.25±1.74     | 7.66±1.49    | 5.87±1.64    | 11.05±2.21   | 13.63±2.58   |
| <b>Without age-adjusted</b> | 8.16±1.61       | 10.25±1.74     | 7.66±1.49    | 5.63±1.66    | 12.22±2.12   | 13.56±3.2    |
| <b>Second year</b>          |                 |                |              |              |              |              |
| <b>With age-adjusted</b>    | 13.68±2.12      | 12.71±2.00     | 11.67±2.18   | 10.65±2.08   | 12.31±2.25   | 14.35±2.46   |
| <b>Without age-adjusted</b> | 13.68±2.12      | 12.71±2.00     | 11.69±2.18   | 10.72±2.09   | 14.8±2.16    | 16.45±2.34   |
| <b>Third year</b>           |                 |                |              |              |              |              |
| <b>With age-adjusted</b>    | 13.96±2.8       | 12.78±2.8      | 12.15±2.68   | 12.74±2.58   | 17.59±3.25   | 23.22±3.91   |
| <b>Without age-adjusted</b> | 14.12±2.79      | 13.04±2.80     | 12.84±2.66   | 13.24±2.55   | 20.69±3.09   | 27.94±3.68   |
| <b>Fourth year</b>          |                 |                |              |              |              |              |
| <b>With age-adjusted</b>    | 18.9±2.04       | 16.49±2.09     | 15.56±2.18   | 16.41±2.08   | 19.16±2.83   | 23.29±2.63   |
| <b>Without age-adjusted</b> | 19.08±2.02      | 16.90±2.07     | 16.08±2.17   | 17.99±2.05   | 22.74±2.83   | 27.53±2.45   |
| <b>Fifth year</b>           |                 |                |              |              |              |              |
| <b>With age-adjusted</b>    | 21.96±2.81      | 22.40±2.75     | 21.93±2.86   | 20.31±2.93   | 23.40±3.16   | 27.58±3.78   |
| <b>Without age-adjusted</b> | 22.61±3.03      | 23.28±2.95     | 23.06±3.05   | 22.24±3.11   | 26.57±3.29   | 32.16±3.56   |

---

|                             |            |            |            |            |            |            |
|-----------------------------|------------|------------|------------|------------|------------|------------|
| <b>6th – 7th years</b>      |            |            |            |            |            |            |
| <b>With age-adjusted</b>    | 30.75±3.04 | 30.4±2.95  | 27.27±3.05 | 31.11±3.15 | 36.50±3.36 | 30.60±3.41 |
| <b>Without age-adjusted</b> | 31.65±3.17 | 31.46±3.06 | 29.98±3.12 | 33.7±3.25  | 41.22±3.53 | 39.23±3.43 |
| <b>8th – 9th years</b>      |            |            |            |            |            |            |
| <b>With age-adjusted</b>    | 47.25±4.82 | 42.91±5.33 | 38.05±5.88 | 40.6±5.23  | 43.38±5.99 | 30.80±6.11 |
| <b>Without age-adjusted</b> | 47.94±4.80 | 44.34±5.3  | 40.69±5.67 | 44.71±5.28 | 52.84±5.93 | 43.21±6.18 |

---

\* SEM = standard error of the mean

Supplementary TABLE 3: The bone conduction hearing deterioration at 0.5–4 kHz with and without age-related correction at the 1- to 9-year follow-up after RT. (Mean±SEM)

| <b>Years</b>                | <b>0.5K Hz</b> | <b>1K Hz</b> | <b>2K Hz</b> | <b>4K Hz</b> |
|-----------------------------|----------------|--------------|--------------|--------------|
| <b>First year</b>           |                |              |              |              |
| <b>With age-adjusted</b>    | 4.96±1.33      | 2.77±0.92    | 4.09±1.21    | 6.68±1.73    |
| <b>Without age-adjusted</b> | 4.81±1.35      | 2.58±0.95    | 3.92±1.25    | 7.53±1.79    |
| <b>Second year</b>          |                |              |              |              |
| <b>With age-adjusted</b>    | 7.06±1.62      | 6.69±1.27    | 5.00±1.38    | 4.74±1.36    |
| <b>Without age-adjusted</b> | 6.96±1.64      | 6.63±1.28    | 5.66±1.44    | 8.31±1.66    |
| <b>Third year</b>           |                |              |              |              |
| <b>With age-adjusted</b>    | 6.00±1.69      | 6.35±1.77    | 6.45±1.68    | 7.32±2.2     |
| <b>Without age-adjusted</b> | 6.27±1.7       | 6.76±1.74    | 6.96±1.53    | 10.10±2.11   |
| <b>Fourth year</b>          |                |              |              |              |
| <b>With age-adjusted</b>    | 10.47±1.41     | 10.43±1.42   | 9.32±1.34    | 9.97±1.82    |
| <b>Without age-adjusted</b> | 10.90±1.43     | 11.21±1.43   | 11.03±1.34   | 14.37±1.75   |
| <b>Fifth year</b>           |                |              |              |              |
| <b>With age-adjusted</b>    | 12.78±1.8      | 11.67±1.9    | 12.84±2.19   | 11.34±2.46   |
| <b>Without age-adjusted</b> | 13.58±1.95     | 12.67±2.05   | 14.48±2.3    | 13.88±2.48   |

---

**6th – 7th years**

|                             |            |            |            |            |
|-----------------------------|------------|------------|------------|------------|
| <b>With age-adjusted</b>    | 19.60±2.22 | 21.71±2.33 | 21.09±2.12 | 20.69±2.48 |
| <b>Without age-adjusted</b> | 20.44±2.29 | 22.13±2.38 | 23.84±2.19 | 25.46±2.5  |

**8th – 9th years**

|                             |            |            |            |            |
|-----------------------------|------------|------------|------------|------------|
| <b>With age-adjusted</b>    | 28.73±3.54 | 28.72±3.98 | 27.95±3.82 | 23.97±4.41 |
| <b>Without age-adjusted</b> | 29.81±3.54 | 30.25±4.02 | 32.25±4.11 | 33.71±3.5  |

---

\* SEM = standard error of the mean

Supplementary TABLE 4: The air and bone conduction hearing deterioration at 0.5–4

kHz with and without age-related correction at the 1- to 9-year follow-up after RT.

| <b>Years</b>                | <b>Air (dB)</b> | <b>p value</b> | <b>Bone (dB)</b> | <b>p value</b> |
|-----------------------------|-----------------|----------------|------------------|----------------|
|                             | <b>Mean±SEM</b> |                | <b>Mean±SEM</b>  |                |
| <b>First year</b>           |                 |                |                  |                |
| <b>With age-adjusted</b>    | 8.71±0.90       | 0.16           | 4.63±0.67        | 0.55           |
| <b>Without age-adjusted</b> | 8.94±0.89       |                | 4.71±0.69        |                |
| <b>Second year</b>          |                 |                |                  |                |
| <b>With age-adjusted</b>    | 11.84±1.06      | 0.02           | 5.87±0.71        | 0.001          |
| <b>Without age-adjusted</b> | 12.48±1.05      |                | 6.89±0.76        |                |
| <b>Third year</b>           |                 |                |                  |                |
| <b>With age-adjusted</b>    | 13.81±1.42      | 0.000          | 6.53±0.92        | 0.005          |
| <b>Without age-adjusted</b> | 14.95±1.40      |                | 7.52±0.89        |                |
| <b>Fourth year</b>          |                 |                |                  |                |
| <b>With age-adjusted</b>    | 16.91±1.16      | 0.000          | 10.05±0.75       | 0.000          |
| <b>Without age-adjusted</b> | 18.43±1.16      |                | 11.88±0.75       |                |
| <b>Fifth year</b>           |                 |                |                  |                |
| <b>With age-adjusted</b>    | 22.01±1.46      | 0.000          | 12.16±1.05       | 0.026          |

---

|                             |            |       |            |       |
|-----------------------------|------------|-------|------------|-------|
| <b>Without age-adjusted</b> | 23.79±1.55 |       | 13.65±1.10 |       |
| <b>6th – 7th years</b>      |            |       |            |       |
| <b>With age-adjusted</b>    | 31.57±1.57 | 0.000 | 20.55±1.14 | 0.000 |
| <b>Without age-adjusted</b> | 34.09±1.63 |       | 22.96±1.17 |       |
| <b>8th – 9th years</b>      |            |       |            |       |
| <b>With age-adjusted</b>    | 41.25±2.70 | 0.000 | 27.34±1.96 | 0.000 |
| <b>Without age-adjusted</b> | 45.64±2.74 |       | 31.5±1.88  |       |

---

\* SEM = standard error of the mean
